# Supplementary material
Source: MDPI journal article supplement (https://www.mdpi.com/2227-7390/8/8/1329)
Supplement: s1 [file s1]

**Table S1.** Habitat variables considered in the species distribution models

| Number | Environmental variables (Standard Code*)                        | Code       |
|--------|-----------------------------------------------------------------|------------|
| 1      | Annual mean temperature (BIO1) (°C)                             | C_AMT      |
| 2      | Mean diurnal range (BIO2) (°C)                                  | C_MDR      |
| 3      | Isothermality (BIO3=BIO2/BIO7 (x100)), %                        | C_ISOT     |
| 4      | Temperature seasonality (standard deviation *100) (BIO4) (%)    | C_TSeason  |
| 5      | Max. temperature in warmest month (BIO5) (°C)                   | C_MaxTWM   |
| 6      | Min. temperature in coldest month (BIO6) (°C)                   | C_MinTCM   |
| 7      | Annual temperature range (BIO7=BIO5-BIO6) (°C)                  | C_TAnR     |
| 8      | Mean temperature in wettest quarter (BIO8)(°C)                  | C_MTWetQ   |
| 9      | Mean temperature in driest quarter (BIO9) (°C)                  | C_MeanTDrQ |
| 10     | Mean temperature in warmest quarter (BIO10) (°C)                | C_MTWarQ   |
| 11     | Mean temperature in coldest quarter (BIO11)(°C)                 | C_MTColdQ  |
| 12     | Annual precipitation (BIO12)(mm)                                | C_AnP      |
| 13     | Precipitation in wettest month (BIO13) (mm)                     | C_PWetM    |
| 14     | Precipitation in driest month (BIO14) (mm)                      | C_PDrM     |
| 15     | Precipitation seasonality (coefficient of variation)(BIO15) (%) | C_PCoefVar |
| 16     | Precipitation in wettest quarter(BIO16) (mm)                    | C_PWetQ    |
| 17     | Precipitation in driest quarter (BIO17)(mm)                     | C_PDrQ     |
| 18     | Precipitation in warmest quarter (BIO18) (mm)                   | C_PWarmQ   |
| 19     | Precipitation in coldest quarter (BIO19)(mm)                    | C_PColdQ   |
| 20     | Solar irradiation (kJ m <sup>-2</sup> day <sup>-1</sup> )       | C_SRad     |
| 21     | Wind speed (m s <sup>-1</sup> )                                 | C_WindS    |
| 22     | Elevation (m)                                                   | T_EL       |
| 23     | Exposure aspect (°)                                             | T_EXP      |
| 24     | Inclination angles (°)                                          | T_INCL     |
| 25     | Distance to settlements in rural area (m)                       | L-DSR      |
| 26     | Distance to water polygons (lakes, reserves) (m)                | L_DWP      |
| 27     | Distance to settlements in urban area (m)                       | L_DSU      |
| 28     | Distance to road (m)                                            | L_DHW      |
| 29     | Distance to river, stream (m)                                   | L_DRS      |
| 30     | Distance to railway (m)                                         | L_DRW      |
| 31     | Vegetation type                                                 | L_VEG      |

\*<https://www.worldclim.org/data/bioclim.html> (accessed on 09.07.2020)
