# Supplementary material
Source: MDPI journal article supplement (https://www.mdpi.com/2227-7390/8/8/1329)
Supplement: s1 [file s1]

**Table S2.** Average Nearest Neighbor Index (ANNI) of the species occurrence data, where n is the number of sampling sites, Z score is the statistic value showing validity of the null hypothesis of a random distribution of points.

| Species                 | Data set | n   | Real means (m) | Expected mean distance (m) | ANNI | Z-score | P-value | Type of distribution |
|-------------------------|----------|-----|----------------|----------------------------|------|---------|---------|----------------------|
| <i>D. dahli</i>         | All      | 165 | 2113           | 5680                       | 0.37 | -15.43  | <<0.0   | Clustered            |
| <i>D. dahli</i>         | Reduced  | 46  | 9747           | 10,698                     | 0.91 | -1.15   | 0.249   | Random               |
| <i>D. mixta</i>         | All      | 67  | 6691           | 10,614                     | 0.63 | -5.83   | <<0.0   | Clustered            |
| <i>D. mixta</i>         | Reduced  | 41  | 12,039         | 13,669                     | 0.88 | -1.46   | 0.144   | Random               |
| <i>D. portschinskii</i> | All      | 259 | 3834           | 8759                       | 0.44 | -17.31  | <<0.0   | Clustered            |
| <i>D. portschinskii</i> | Reduced  | 86  | 9802           | 10,679                     | 0.92 | -1.41   | 0.16    | Random               |
